# Supplementary material for: Detection of independent associations in a large epidemiologic dataset: a comparison of random forests, boosted regression trees, conventional and penalized logistic regression for identifying independent factors associated with H1N1pdm influenza infections
Source: PubMed Central journal article supplement (PMC4146451; doi:10.1186/1471-2288-14-99), 2014-08-26
Supplement: 1471-2288-14-99-S1.pdf [file 1471-2288-14-99-S1.pdf]

## Additional file 1

### Simulated data

Five hundred datasets were sampled from a multivariate normal distribution with standard normal marginal (the simulation process is summarized in Table 1). We simulated a binary outcome using the following logit model:

$$\log\left(\frac{p_i}{1-p_i}\right) = \mu + \sum_{j=1}^C \beta_{cont_j} c_{i,j} + \sum_{k=1}^B \beta_{bin_k} b_{i,k} + \sum_{l=1}^C \sum_{m=1}^C \eta_{cont_{lm}} c_{i,l} c_{i,m} + \sum_{n=1}^B \sum_{o=1}^B \eta_{bin_{no}} b_{i,n} b_{i,o} + \varepsilon$$

with C (C=150) the number of continuous covariates  $c$  and B (B=150) the number of binary covariates  $b$ . To mimic binary covariates, sampled continuous covariates were set equal to 0 or 1 depending on whether the sampled values were lower or higher than the median of the standard normal distribution. The interaction parameters  $\eta_{cont_{kl}}$  and  $\eta_{bin_{kl}}$  were set equal to 0, except for the special cases  $\eta_{cont_{12}} = \eta_{bin_{12}} = 0.5$ . The sample size was 500 and the mean proportion of outcome in the 500 simulated datasets was 14% (95% CI = [11%;18%]).

Two scenarios were simulated, in scenario 1 (whose results are detailed in the manuscript) twenty covariates (the 8 associated covariates and 12 non-associated covariates - 6 continuous and 6 binary) were correlated ( $\rho=0.5$ ). In scenario 2, we increased the number of correlated covariates to 58 (the 8 associated covariates and 50 non-associated covariates).

## Tables

**Table 1 Summary of the simulation process**

| Scenario                                             | Scenario 1                                                                                                                                                                                       | Scenario 2                                                                                                                                                                                       |
|------------------------------------------------------|--------------------------------------------------------------------------------------------------------------------------------------------------------------------------------------------------|--------------------------------------------------------------------------------------------------------------------------------------------------------------------------------------------------|
| <b>Number of continuous covariates (C)</b>           | 150                                                                                                                                                                                              | 150                                                                                                                                                                                              |
| <b>Number of binary covariates (B)</b>               | 150                                                                                                                                                                                              | 150                                                                                                                                                                                              |
| <b>Number of covariates with direct effects</b>      | 8                                                                                                                                                                                                | 8                                                                                                                                                                                                |
| <b>Number of covariates with interaction effects</b> | 4                                                                                                                                                                                                | 4                                                                                                                                                                                                |
| <b>Number of non-associated covariates</b>           | 292                                                                                                                                                                                              | 292                                                                                                                                                                                              |
| <b>Intercept</b>                                     | $\mu = 1.5$                                                                                                                                                                                      | $\mu = 1.5$                                                                                                                                                                                      |
| <b>Direct effects</b>                                | $\beta_{cont_i} = \beta_{bin_i}$ $= \begin{cases} 0.5 & \text{if } i \in \{1:4\} \\ 0 & \text{otherwise} \end{cases}$                                                                            | $\beta_{cont_i} = \beta_{bin_i}$ $= \begin{cases} 0.5 & \text{if } i \in \{1:4\} \\ 0 & \text{otherwise} \end{cases}$                                                                            |
| <b>Gaussian noise</b>                                | $\varepsilon \sim \mathcal{N}(0,1)$                                                                                                                                                              | $\varepsilon \sim \mathcal{N}(0,1)$                                                                                                                                                              |
| <b>Covariances</b>                                   | $Cov(x_{i,j}, x_{i,k}) =$ $\begin{cases} 1 & \text{if } i = j \\ 0.5 & \text{if } i, j \in \{1:10\} \\ 0 & \text{otherwise} \end{cases}$ <p>with x either a binary or a continuous covariate</p> | $Cov(x_{i,j}, x_{i,k}) =$ $\begin{cases} 1 & \text{if } i = j \\ 0.5 & \text{if } i, j \in \{1:29\} \\ 0 & \text{otherwise} \end{cases}$ <p>with x either a binary or a continuous covariate</p> |

**Table 2. Performances of RF, BRT, LASSO and UFMLR in the 500 simulated datasets (Type I error 1%) – Scenario 1.** Performances are shown as: Mean (95% confidence interval)

|                                                           | n   | RF               | BRT              | LASSO-max        | LASSO-se         | UFMLR05        | UFMLR05<br>backward | UFMLR20        | UFMLR20<br>backward |
|-----------------------------------------------------------|-----|------------------|------------------|------------------|------------------|----------------|---------------------|----------------|---------------------|
| <b>Type I error 1%</b>                                    |     |                  |                  |                  |                  |                |                     |                |                     |
| <u>True Positive Rates (TPR)</u>                          | 8   | 58% (17% - 99%)  | 53% (20% - 86%)  | 72% (44% - 100%) | 71% (41% - 100%) | 11% (0% - 31%) | 29% (6% - 53%)      | 11% (0% - 44%) | 38% (1% - 75%)      |
| <i>Covariates with pairwise interaction</i>               | 4   | 60% (9% - 100%)  | 54% (7% - 100%)  | 71% (30% - 100%) | 69% (25% - 100%) | 9% (0% - 36%)  | 25% (0% - 61%)      | 10% (0% - 46%) | 35% (0% - 84%)      |
| <i>Covariates without pairwise interaction</i>            | 4   | 56% (8% - 100%)  | 53% (9% - 96%)   | 74% (34% - 100%) | 73% (32% - 100%) | 13% (0% - 44%) | 34% (0% - 75%)      | 12% (0% - 52%) | 42% (0% - 90%)      |
| <i>Continuous covariates</i>                              | 4   | 71% (14% - 100%) | 66% (24% - 100%) | 79% (44% - 100%) | 77% (41% - 100%) | 15% (0% - 46%) | 34% (0% - 69%)      | 12% (0% - 51%) | 43% (0% - 86%)      |
| <i>Binary covariates</i>                                  | 4   | 45% (0% - 96%)   | 40% (0% - 89%)   | 66% (23% - 100%) | 64% (20% - 100%) | 7% (0% - 31%)  | 25% (0% - 59%)      | 9% (0% - 46%)  | 33% (0% - 80%)      |
| <u>False Positive Rates (FPR)</u>                         | 292 | 1% (0% - 2%)     | 1% (0% - 2%)     | 4% (0% - 9%)     | 3% (0% - 8%)     | 1% (0% - 2%)   | 1% (0% - 3%)        | 2% (0% - 9%)   | 5% (0% - 15%)       |
| <i>Covariates correlated with associated covariates</i>   | 12  | 18% (0% - 45%)   | 12% (0% - 31%)   | 20% (0% - 43%)   | 18% (0% - 41%)   | 1% (0% - 5%)   | 3% (0% - 13%)       | 3% (0% - 31%)  | 13% (0% - 52%)      |
| <i>Covariates uncorrelated with associated covariates</i> | 280 | 0% (0% - 1%)     | 1% (0% - 2%)     | 3% (0% - 8%)     | 3% (0% - 8%)     | 1% (0% - 2%)   | 1% (0% - 2%)        | 1% (0% - 8%)   | 5% (0% - 14%)       |
| <i>Continuous covariates</i>                              | 146 | 1% (0% - 3%)     | 1% (0% - 2%)     | 4% (0% - 10%)    | 4% (0% - 9%)     | 1% (0% - 2%)   | 1% (0% - 3%)        | 2% (0% - 9%)   | 5% (0% - 16%)       |
| <i>Binary covariates</i>                                  | 146 | 1% (0% - 3%)     | 1% (0% - 4%)     | 4% (0% - 9%)     | 3% (0% - 8%)     | 1% (0% - 2%)   | 1% (0% - 3%)        | 1% (0% - 9%)   | 5% (0% - 16%)       |

**Table 3 Performances of RF, BRT, LASSO and UFMLR in the 500 simulated datasets (Type I error 5%) – Scenario 2.** Performances are shown as: Mean (95% confidence interval)

|                                                           | n   | RF               | BRT              | LASSO-max        | LASSO-se         | UFMLR05        | UFMLR05 backward | UFMLR20        | UFMLR20 backward |
|-----------------------------------------------------------|-----|------------------|------------------|------------------|------------------|----------------|------------------|----------------|------------------|
| <b>Type I error 5%</b>                                    |     |                  |                  |                  |                  |                |                  |                |                  |
| <u>True Positive Rates (TPR)</u>                          | 8   | 68% (30% - 100%) | 72% (40% - 100%) | 70% (41% - 98%)  | 63% (33% - 93%)  | 27% (0% - 56%) | 40% (12% - 67%)  | 16% (0% - 70%) | 56% (10% - 100%) |
| <i>Covariates with pairwise interaction</i>               | 4   | 60% (12% - 100%) | 67% (22% - 100%) | 67% (25% - 100%) | 60% (13% - 100%) | 23% (0% - 64%) | 35% (0% - 77%)   | 15% (0% - 71%) | 54% (0% - 100%)  |
| <i>Covariates without pairwise interaction</i>            | 4   | 77% (31% - 100%) | 77% (35% - 100%) | 72% (32% - 100%) | 66% (26% - 100%) | 31% (0% - 74%) | 44% (1% - 87%)   | 18% (0% - 75%) | 58% (4% - 100%)  |
| <i>Continuous covariates</i>                              | 4   | 63% (13% - 100%) | 70% (29% - 100%) | 73% (36% - 100%) | 68% (29% - 100%) | 33% (0% - 75%) | 45% (6% - 83%)   | 18% (0% - 76%) | 60% (8% - 100%)  |
| <i>Binary covariates</i>                                  | 4   | 74% (23% - 100%) | 74% (27% - 100%) | 66% (24% - 100%) | 58% (15% - 100%) | 20% (0% - 58%) | 34% (0% - 72%)   | 14% (0% - 68%) | 52% (0% - 100%)  |
| <u>False Positive Rates (FPR)</u>                         | 292 | 5% (1% - 10%)    | 6% (4% - 9%)     | 9% (1% - 17%)    | 4% (0% - 9%)     | 2% (0% - 5%)   | 3% (1% - 5%)     | 4% (0% - 20%)  | 14% (0% - 31%)   |
| <i>Covariates correlated with associated covariates</i>   | 50  | 26% (1% - 50%)   | 25% (10% - 41%)  | 16% (5% - 26%)   | 12% (3% - 21%)   | 4% (0% - 11%)  | 6% (0% - 13%)    | 9% (0% - 56%)  | 33% (0% - 84%)   |
| <i>Covariates uncorrelated with associated covariates</i> | 242 | 1% (0% - 2%)     | 3% (1% - 5%)     | 8% (0% - 16%)    | 3% (0% - 8%)     | 2% (0% - 4%)   | 3% (1% - 5%)     | 3% (0% - 13%)  | 11% (1% - 20%)   |
| <i>Continuous covariates</i>                              | 146 | 4% (0% - 9%)     | 5% (2% - 8%)     | 9% (1% - 18%)    | 5% (0% - 10%)    | 3% (0% - 6%)   | 4% (1% - 7%)     | 4% (0% - 21%)  | 15% (0% - 32%)   |
| <i>Binary covariates</i>                                  | 146 | 6% (0% - 12%)    | 8% (3% - 13%)    | 9% (1% - 17%)    | 4% (0% - 9%)     | 2% (0% - 5%)   | 3% (0% - 6%)     | 4% (0% - 19%)  | 14% (0% - 30%)   |

**Table 4. Performances of RF, BRT, LASSO and UFMLR in the 500 simulated datasets (Type I error 1%) – Scenario 2.** Performances are shown as: Mean (95% confidence interval)

|                                                           | n   | RF              | BRT              | LASSO-max        | LASSO-se         | UFMLR05        | UFMLR05 backward | UFMLR20        | UFMLR20 backward |
|-----------------------------------------------------------|-----|-----------------|------------------|------------------|------------------|----------------|------------------|----------------|------------------|
| <b>Type I error 1%</b>                                    |     |                 |                  |                  |                  |                |                  |                |                  |
| <u>True Positive Rates (TPR)</u>                          | 8   | 40% (2% - 78%)  | 53% (20% - 87%)  | 65% (35% - 94%)  | 62% (32% - 92%)  | 10% (0% - 32%) | 27% (2% - 51%)   | 10% (0% - 60%) | 44% (0% - 99%)   |
| <i>Covariates with pairwise interaction</i>               | 4   | 28% (0% - 73%)  | 44% (0% - 93%)   | 60% (15% - 100%) | 59% (12% - 100%) | 7% (0% - 32%)  | 22% (0% - 59%)   | 9% (0% - 60%)  | 42% (0% - 100%)  |
| <i>Covariates without pairwise interaction</i>            | 4   | 52% (0% - 100%) | 63% (17% - 100%) | 69% (29% - 100%) | 66% (25% - 100%) | 14% (0% - 47%) | 31% (0% - 70%)   | 11% (0% - 62%) | 47% (0% - 100%)  |
| <i>Continuous covariates</i>                              | 4   | 36% (0% - 81%)  | 55% (13% - 97%)  | 71% (33% - 100%) | 68% (29% - 100%) | 14% (0% - 48%) | 30% (0% - 65%)   | 11% (0% - 63%) | 48% (0% - 100%)  |
| <i>Binary covariates</i>                                  | 4   | 44% (0% - 100%) | 51% (1% - 100%)  | 58% (14% - 100%) | 56% (13% - 100%) | 6% (0% - 30%)  | 23% (0% - 56%)   | 9% (0% - 59%)  | 41% (0% - 100%)  |
| <u>False Positive Rates (FPR)</u>                         | 292 | 2% (0% - 4%)    | 2% (0% - 4%)     | 5% (0% - 10%)    | 4% (0% - 9%)     | 1% (0% - 2%)   | 1% (0% - 3%)     | 3% (0% - 19%)  | 11% (0% - 30%)   |
| <i>Covariates correlated with associated covariates</i>   | 50  | 11% (0% - 25%)  | 10% (0% - 20%)   | 13% (4% - 23%)   | 12% (3% - 21%)   | 1% (0% - 4%)   | 2% (0% - 7%)     | 7% (0% - 54%)  | 25% (0% - 80%)   |
| <i>Covariates uncorrelated with associated covariates</i> | 242 | 0% (0% - 1%)    | 0% (0% - 1%)     | 4% (0% - 9%)     | 3% (0% - 7%)     | 1% (0% - 2%)   | 1% (0% - 3%)     | 2% (0% - 12%)  | 8% (0% - 19%)    |
| <i>Continuous covariates</i>                              | 146 | 2% (0% - 5%)    | 2% (0% - 4%)     | 6% (0% - 11%)    | 4% (0% - 10%)    | 1% (0% - 2%)   | 2% (0% - 4%)     | 3% (0% - 20%)  | 11% (0% - 31%)   |
| <i>Binary covariates</i>                                  | 146 | 2% (0% - 6%)    | 2% (0% - 5%)     | 5% (0% - 10%)    | 4% (0% - 9%)     | 1% (0% - 2%)   | 1% (0% - 3%)     | 3% (0% - 18%)  | 10% (0% - 29%)   |

**Table 5 Performances of UFMLR in the 500 simulated datasets (Type I error 5%) – Scenario 1.** <sup>w</sup> Wald test Pvalue. <sup>p</sup> permutation test Pvalue. Performances are shown as: Mean (95% confidence interval)

|                                                           | <b>n</b> | <b>UFMLR05<sup>w</sup></b> | <b>UFMLR05<sup>p</sup></b> | <b>UFMLR05 backward<sup>w</sup></b> | <b>UFMLR05 backward<sup>p</sup></b> | <b>UFMLR20<sup>w</sup></b> | <b>UFMLR20<sup>p</sup></b> | <b>UFMLR20 backward<sup>w</sup></b> | <b>UFMLR20 backward<sup>p</sup></b> |
|-----------------------------------------------------------|----------|----------------------------|----------------------------|-------------------------------------|-------------------------------------|----------------------------|----------------------------|-------------------------------------|-------------------------------------|
| <b>Type I error 5%</b>                                    |          |                            |                            |                                     |                                     |                            |                            |                                     |                                     |
| <u>True Positive Rates (TPR)</u>                          | 8        | 31% (5% - 58%)             | 28% (3% - 54%)             | 47% (22% - 72%)                     | 45% (20% - 70%)                     | 32% (0% - 74%)             | 26% (0% - 65%)             | 51% (16% - 86%)                     | 49% (15% - 84%)                     |
| <i>Covariates with pairwise interaction</i>               | 4        | 27% (0% - 66%)             | 24% (0% - 63%)             | 43% (0% - 86%)                      | 41% (0% - 83%)                      | 30% (0% - 81%)             | 24% (0% - 72%)             | 47% (0% - 97%)                      | 46% (0% - 96%)                      |
| <i>Covariates without pairwise interaction</i>            | 4        | 36% (0% - 79%)             | 32% (0% - 74%)             | 51% (8% - 94%)                      | 50% (6% - 93%)                      | 34% (0% - 86%)             | 28% (0% - 76%)             | 55% (7% - 100%)                     | 53% (5% - 100%)                     |
| <i>Continuous covariates</i>                              | 4        | 38% (0% - 80%)             | 35% (0% - 74%)             | 51% (17% - 86%)                     | 49% (15% - 84%)                     | 35% (0% - 87%)             | 29% (0% - 76%)             | 56% (16% - 97%)                     | 55% (14% - 95%)                     |
| <i>Binary covariates</i>                                  | 4        | 24% (0% - 61%)             | 22% (0% - 57%)             | 43% (9% - 76%)                      | 41% (8% - 74%)                      | 29% (0% - 78%)             | 23% (0% - 69%)             | 46% (0% - 92%)                      | 44% (0% - 90%)                      |
| <u>False Positive Rates (FPR)</u>                         | 292      | 3% (1% - 4%)               | 2% (1% - 4%)               | 3% (1% - 5%)                        | 3% (1% - 5%)                        | 6% (0% - 14%)              | 4% (0% - 12%)              | 9% (0% - 18%)                       | 9% (0% - 18%)                       |
| <i>Covariates correlated with associated covariates</i>   | 12       | 4% (0% - 16%)              | 4% (0% - 15%)              | 8% (0% - 23%)                       | 7% (0% - 22%)                       | 12% (0% - 44%)             | 9% (0% - 39%)              | 20% (0% - 61%)                      | 19% (0% - 60%)                      |
| <i>Covariates uncorrelated with associated covariates</i> | 280      | 2% (1% - 4%)               | 2% (1% - 4%)               | 3% (1% - 5%)                        | 3% (1% - 4%)                        | 6% (0% - 13%)              | 4% (0% - 11%)              | 9% (1% - 16%)                       | 8% (0% - 16%)                       |
| <i>Continuous covariates</i>                              | 146      | 3% (0% - 5%)               | 2% (0% - 5%)               | 3% (0% - 6%)                        | 3% (0% - 6%)                        | 6% (0% - 15%)              | 5% (0% - 13%)              | 9% (0% - 19%)                       | 9% (0% - 18%)                       |
| <i>Binary covariates</i>                                  | 146      | 2% (0% - 5%)               | 2% (0% - 5%)               | 3% (0% - 6%)                        | 3% (0% - 5%)                        | 6% (0% - 15%)              | 4% (0% - 12%)              | 9% (0% - 19%)                       | 9% (0% - 18%)                       |

**Table 6 Performances of UFMLR in the 500 simulated datasets (Type I error 1%) – Scenario 1.** <sup>w</sup> Wald test Pvalue. <sup>p</sup> permutation test Pvalue. Performances are shown as: Mean (95% confidence interval)

|                                                           | <b>n</b> | <b>UFMLR05<sup>w</sup></b> | <b>UFMLR05<sup>p</sup></b> | <b>UFMLR05 backward<sup>w</sup></b> | <b>UFMLR05 backward<sup>p</sup></b> | <b>UFMLR20<sup>w</sup></b> | <b>UFMLR20<sup>p</sup></b> | <b>UFMLR20 backward<sup>w</sup></b> | <b>UFMLR20 backward<sup>p</sup></b> |
|-----------------------------------------------------------|----------|----------------------------|----------------------------|-------------------------------------|-------------------------------------|----------------------------|----------------------------|-------------------------------------|-------------------------------------|
| <b>Type I error 1%</b>                                    |          |                            |                            |                                     |                                     |                            |                            |                                     |                                     |
| <u>True Positive Rates (TPR)</u>                          | 8        | 14% (0% - 36%)             | 11% (0% - 31%)             | 34% (10% - 58%)                     | 29% (6% - 53%)                      | 17% (0% - 54%)             | 11% (0% - 44%)             | 43% (7% - 78%)                      | 38% (1% - 75%)                      |
| <i>Covariates with pairwise interaction</i>               | 4        | 11% (0% - 40%)             | 9% (0% - 36%)              | 29% (0% - 66%)                      | 25% (0% - 61%)                      | 16% (0% - 59%)             | 10% (0% - 46%)             | 39% (0% - 89%)                      | 35% (0% - 84%)                      |
| <i>Covariates without pairwise interaction</i>            | 4        | 17% (0% - 50%)             | 13% (0% - 44%)             | 39% (0% - 81%)                      | 34% (0% - 75%)                      | 19% (0% - 63%)             | 12% (0% - 52%)             | 46% (0% - 95%)                      | 42% (0% - 90%)                      |
| <i>Continuous covariates</i>                              | 4        | 18% (0% - 53%)             | 15% (0% - 46%)             | 39% (5% - 73%)                      | 34% (0% - 69%)                      | 19% (0% - 63%)             | 12% (0% - 51%)             | 48% (8% - 88%)                      | 43% (0% - 86%)                      |
| <i>Binary covariates</i>                                  | 4        | 9% (0% - 37%)              | 7% (0% - 31%)              | 29% (0% - 61%)                      | 25% (0% - 59%)                      | 15% (0% - 57%)             | 9% (0% - 46%)              | 37% (0% - 84%)                      | 33% (0% - 80%)                      |
| <u>False Positive Rates (FPR)</u>                         | 292      | 1% (0% - 2%)               | 1% (0% - 2%)               | 1% (0% - 3%)                        | 1% (0% - 3%)                        | 3% (0% - 10%)              | 2% (0% - 9%)               | 6% (0% - 16%)                       | 5% (0% - 15%)                       |
| <i>Covariates correlated with associated covariates</i>   | 12       | 1% (0% - 6%)               | 1% (0% - 5%)               | 4% (0% - 14%)                       | 3% (0% - 13%)                       | 5% (0% - 33%)              | 3% (0% - 31%)              | 15% (0% - 55%)                      | 13% (0% - 52%)                      |
| <i>Covariates uncorrelated with associated covariates</i> | 280      | 1% (0% - 2%)               | 1% (0% - 2%)               | 1% (0% - 3%)                        | 1% (0% - 2%)                        | 3% (0% - 9%)               | 1% (0% - 8%)               | 6% (0% - 15%)                       | 5% (0% - 14%)                       |
| <i>Continuous covariates</i>                              | 146      | 1% (0% - 3%)               | 1% (0% - 2%)               | 2% (0% - 4%)                        | 1% (0% - 3%)                        | 3% (0% - 11%)              | 2% (0% - 9%)               | 6% (0% - 17%)                       | 5% (0% - 16%)                       |
| <i>Binary covariates</i>                                  | 146      | 1% (0% - 2%)               | 1% (0% - 2%)               | 1% (0% - 3%)                        | 1% (0% - 3%)                        | 3% (0% - 10%)              | 1% (0% - 9%)               | 6% (0% - 17%)                       | 5% (0% - 16%)                       |

**Table 7 Performances of UFMLR in the 500 simulated datasets (Type I error 5%) – Scenario 2.** <sup>w</sup> Wald test Pvalue. <sup>p</sup> permutation test Pvalue. Performances are shown as: Mean (95% confidence interval)

|                                                           | <b>n</b> | <b>UFMLR05<sup>w</sup></b> | <b>UFMLR05<sup>p</sup></b> | <b>UFMLR05 backward<sup>w</sup></b> | <b>UFMLR05 backward<sup>p</sup></b> | <b>UFMLR20<sup>w</sup></b> | <b>UFMLR20<sup>p</sup></b> | <b>UFMLR20 backward<sup>w</sup></b> | <b>UFMLR20 backward<sup>p</sup></b> |
|-----------------------------------------------------------|----------|----------------------------|----------------------------|-------------------------------------|-------------------------------------|----------------------------|----------------------------|-------------------------------------|-------------------------------------|
| <b>Type I error 5%</b>                                    |          |                            |                            |                                     |                                     |                            |                            |                                     |                                     |
| <u>True Positive Rates (TPR)</u>                          | 8        | 33% (3% - 63%)             | 27% (0% - 56%)             | 41% (14% - 69%)                     | 40% (12% - 67%)                     | 20% (0% - 79%)             | 16% (0% - 70%)             | 57% (12% - 100%)                    | 56% (10% - 100%)                    |
| <i>Covariates with pairwise interaction</i>               | 4        | 30% (0% - 73%)             | 23% (0% - 64%)             | 38% (0% - 81%)                      | 35% (0% - 77%)                      | 19% (0% - 80%)             | 15% (0% - 71%)             | 55% (0% - 100%)                     | 54% (0% - 100%)                     |
| <i>Covariates without pairwise interaction</i>            | 4        | 36% (0% - 80%)             | 31% (0% - 74%)             | 45% (2% - 89%)                      | 44% (1% - 87%)                      | 22% (0% - 85%)             | 18% (0% - 75%)             | 59% (6% - 100%)                     | 58% (4% - 100%)                     |
| <i>Continuous covariates</i>                              | 4        | 41% (0% - 85%)             | 33% (0% - 75%)             | 47% (8% - 86%)                      | 45% (6% - 83%)                      | 23% (0% - 87%)             | 18% (0% - 76%)             | 61% (9% - 100%)                     | 60% (8% - 100%)                     |
| <i>Binary covariates</i>                                  | 4        | 25% (0% - 66%)             | 20% (0% - 58%)             | 36% (0% - 74%)                      | 34% (0% - 72%)                      | 18% (0% - 76%)             | 14% (0% - 68%)             | 53% (0% - 100%)                     | 52% (0% - 100%)                     |
| <u>False Positive Rates (FPR)</u>                         | 292      | 3% (1% - 6%)               | 2% (0% - 5%)               | 4% (1% - 6%)                        | 3% (1% - 5%)                        | 5% (0% - 22%)              | 4% (0% - 20%)              | 15% (0% - 31%)                      | 14% (0% - 31%)                      |
| <i>Covariates correlated with associated covariates</i>   | 50       | 6% (0% - 15%)              | 4% (0% - 11%)              | 7% (0% - 14%)                       | 6% (0% - 13%)                       | 12% (0% - 59%)             | 9% (0% - 56%)              | 34% (0% - 85%)                      | 33% (0% - 84%)                      |
| <i>Covariates uncorrelated with associated covariates</i> | 242      | 3% (1% - 5%)               | 2% (0% - 4%)               | 3% (1% - 5%)                        | 3% (1% - 5%)                        | 4% (0% - 15%)              | 3% (0% - 13%)              | 11% (2% - 20%)                      | 11% (1% - 20%)                      |
| <i>Continuous covariates</i>                              | 146      | 4% (0% - 7%)               | 3% (0% - 6%)               | 4% (1% - 7%)                        | 4% (1% - 7%)                        | 6% (0% - 23%)              | 4% (0% - 21%)              | 16% (0% - 32%)                      | 15% (0% - 32%)                      |
| <i>Binary covariates</i>                                  | 146      | 3% (0% - 6%)               | 2% (0% - 5%)               | 3% (0% - 6%)                        | 3% (0% - 6%)                        | 5% (0% - 21%)              | 4% (0% - 19%)              | 14% (0% - 30%)                      | 14% (0% - 30%)                      |



**Table 8 Performances of UFMLR in the 500 simulated datasets (Type I error 1%) – Scenario 2.** <sup>w</sup> Wald test Pvalue. <sup>p</sup> permutation test Pvalue. Performances are shown as: Mean (95% confidence interval)

|                                                           | <b>n</b> | <b>UFMLR05<sup>w</sup></b> | <b>UFMLR05<sup>p</sup></b> | <b>UFMLR05 backward<sup>w</sup></b> | <b>UFMLR05 backward<sup>p</sup></b> | <b>UFMLR20<sup>w</sup></b> | <b>UFMLR20<sup>p</sup></b> | <b>UFMLR20 backward<sup>w</sup></b> | <b>UFMLR20 backward<sup>p</sup></b> |
|-----------------------------------------------------------|----------|----------------------------|----------------------------|-------------------------------------|-------------------------------------|----------------------------|----------------------------|-------------------------------------|-------------------------------------|
| <b>Type I error 1%</b>                                    |          |                            |                            |                                     |                                     |                            |                            |                                     |                                     |
| <u>True Positive Rates (TPR)</u>                          | 8        | 16% (0% - 41%)             | 10% (0% - 32%)             | 30% (6% - 55%)                      | 27% (2% - 51%)                      | 14% (0% - 66%)             | 10% (0% - 60%)             | 51% (1% - 100%)                     | 44% (0% - 99%)                      |
| <i>Covariates with pairwise interaction</i>               | 4        | 12% (0% - 44%)             | 7% (0% - 32%)              | 26% (0% - 64%)                      | 22% (0% - 59%)                      | 13% (0% - 67%)             | 9% (0% - 60%)              | 49% (0% - 100%)                     | 42% (0% - 100%)                     |
| <i>Covariates without pairwise interaction</i>            | 4        | 20% (0% - 59%)             | 14% (0% - 47%)             | 35% (0% - 75%)                      | 31% (0% - 70%)                      | 15% (0% - 70%)             | 11% (0% - 62%)             | 53% (0% - 100%)                     | 47% (0% - 100%)                     |
| <i>Continuous covariates</i>                              | 4        | 22% (0% - 60%)             | 14% (0% - 48%)             | 35% (0% - 71%)                      | 30% (0% - 65%)                      | 16% (0% - 72%)             | 11% (0% - 63%)             | 55% (0% - 100%)                     | 48% (0% - 100%)                     |
| <i>Binary covariates</i>                                  | 4        | 11% (0% - 41%)             | 6% (0% - 30%)              | 25% (0% - 61%)                      | 23% (0% - 56%)                      | 12% (0% - 64%)             | 9% (0% - 59%)              | 47% (0% - 100%)                     | 41% (0% - 100%)                     |
| <u>False Positive Rates (FPR)</u>                         | 292      | 1% (0% - 3%)               | 1% (0% - 2%)               | 2% (0% - 3%)                        | 1% (0% - 3%)                        | 3% (0% - 19%)              | 3% (0% - 19%)              | 13% (0% - 31%)                      | 11% (0% - 30%)                      |
| <i>Covariates correlated with associated covariates</i>   | 50       | 1% (0% - 6%)               | 1% (0% - 4%)               | 3% (0% - 7%)                        | 2% (0% - 7%)                        | 8% (0% - 54%)              | 7% (0% - 54%)              | 29% (0% - 83%)                      | 25% (0% - 80%)                      |
| <i>Covariates uncorrelated with associated covariates</i> | 242      | 1% (0% - 3%)               | 1% (0% - 2%)               | 1% (0% - 3%)                        | 1% (0% - 3%)                        | 2% (0% - 12%)              | 2% (0% - 12%)              | 9% (0% - 20%)                       | 8% (0% - 19%)                       |
| <i>Continuous covariates</i>                              | 146      | 1% (0% - 4%)               | 1% (0% - 2%)               | 2% (0% - 4%)                        | 2% (0% - 4%)                        | 4% (0% - 20%)              | 3% (0% - 20%)              | 13% (0% - 32%)                      | 11% (0% - 31%)                      |
| <i>Binary covariates</i>                                  | 146      | 1% (0% - 3%)               | 1% (0% - 2%)               | 2% (0% - 4%)                        | 1% (0% - 3%)                        | 3% (0% - 19%)              | 3% (0% - 18%)              | 12% (0% - 30%)                      | 10% (0% - 29%)                      |
